# Supplementary material
Source: PubMed Central journal article supplement (PMC6314127)
Supplement: supp_RA118.005273_139997_1_supp_216720_pg3f33.pdf [file supp_RA118.005273_139997_1_supp_216720_pg3f33.pdf]

Supplemental information for:

A single amino acid distorts the Fc  $\gamma$  receptor IIIb / CD16b structure upon binding immunoglobulin G1 and reduces affinity relative to CD16a

Jacob T. Roberts and Adam W. Barb

Roy J. Carver Department of Biochemistry, Biophysics and Molecular Biology  
Iowa State University, Ames, Iowa

Including:

Table S1

Figures S1-3

**Table S1.** Data collection and refinement statistics for the IgG1 Fc : CD16b (N38Q/N64Q/N74Q/N169Q) complex (PDB-ID 6EAQ).

|                                        |                              |
|----------------------------------------|------------------------------|
| Space group                            | C 2                          |
| Protein chains per asymmetric unit     | 3                            |
| Unit cell parameters                   |                              |
| a, b, c (Å)                            | 123.629, 49.388, 139.415     |
| $\alpha, \beta, \gamma$ (°)            | 90, 103.037, 90              |
| Resolution (Å)                         | 45.27 - 2.22 (2.299 - 2.22)* |
| Total reflections                      | 141822 (10166)               |
| Unique reflections                     | 40439 (3536)                 |
| Multiplicity                           | 3.5 (2.9)                    |
| Completeness (%)                       | 0.97 (0.88)                  |
| Mean I/ $\sigma$ (I)                   | 7.01 (1.41)                  |
| Wilson B-factor                        | 38.57                        |
| $R_{\text{merge}}$                     | 0.1769 (2.41)                |
| $R_{\text{max}}$                       | 0.2099 (2.973)               |
| CC1/2                                  | 0.974 (0.755)                |
| CC*                                    | 0.993 (0.928)                |
| Reflections used in refinement         | 39714 (3018)                 |
| Reflections used for $R_{\text{free}}$ | 2750 (205)                   |
| $R_{\text{work}}$                      | 0.2218 (0.5613)              |
| $R_{\text{free}}$                      | 0.2477 (0.5929)              |
| Number of non-hydrogen atoms           | 5202                         |
| macromolecules                         | 4581                         |
| ligands                                | 262                          |
| Protein residues                       | 595                          |
| RMS bond lengths (Å)                   | 0.010                        |
| RMS bond angles (°)                    | 1.08                         |
| Ramachandran statistics                |                              |
| favored (%)                            | 98.3                         |
| allowed (%)                            | 1.7                          |
| outliers (%)                           | 0                            |
| Rotamer outliers (%)                   | 1.2                          |
| Clashscore                             | 6.27                         |
| B-factors                              |                              |
| average (Å <sup>2</sup> )              | 42.89                        |
| macromolecules (Å <sup>2</sup> )       | 41.90                        |
| ligands (Å <sup>2</sup> )              | 56.42                        |
| solvent (Å <sup>2</sup> )              | 45.63                        |

\*values in parentheses refer to the highest resolution shell

|            |                                                                                         |
|------------|-----------------------------------------------------------------------------------------|
| CD16b-NA2  | MWQLLLPTALLLLVSAGMRTEDLPKAVVFLEPQWYSVLEKDSVTLKCQGAYSPEDNSTQW                            |
| CD16b-NA1  | MWQLLLPTALLLLVSAGMRTEDLPKAVVFLEPQWYRVLEKDSVTLKCQGAYSPEDNSTQW                            |
| CD16a-V158 | MWQLLLPTALLLLVSAGMRTEDLPKAVVFLEPQWYRVLEKDSVTLKCQGAYSPEDNSTQW                            |
| CD16a-F158 | MWQLLLPTALLLLVSAGMRTEDLPKAVVFLEPQWYRVLEKDSVTLKCQGAYSPEDNSTQW<br>*****                   |
| CD16b-NA2  | FHNESLISSQASSYFIDAATVNDSDGEYRCQTNLSTLSDPVQLEVHIGWLLLQAPRWVFKE                           |
| CD16b-NA1  | FHNENLISSQASSYFIDAATVDDSDGEYRCQTNLSTLSDPVQLEVHVGWLLLQAPRWVFKE                           |
| CD16a-V158 | FHNESLISSQASSYFIDAATVDDSDGEYRCQTNLSTLSDPVQLEVHIGWLLLQAPRWVFKE                           |
| CD16a-F158 | FHNESLISSQASSYFIDAATVDDSDGEYRCQTNLSTLSDPVQLEVHIGWLLLQAPRWVFKE<br>****.*****.*****:***** |
| CD16b-NA2  | EDPIHLRCHSWKNTALHKVTYLQNGKDRKYFHHNSDFHIPKATLKDSGSYFCRGLVGSKN                            |
| CD16b-NA1  | EDPIHLRCHSWKNTALHKVTYLQNGKDRKYFHHNSDFHIPKATLKDSGSYFCRGLVGSKN                            |
| CD16a-V158 | EDPIHLRCHSWKNTALHKVTYLQNGKGRKYFHHNSDFYIPKATLKDSGSYFCRGLVGSKN                            |
| CD16a-F158 | EDPIHLRCHSWKNTALHKVTYLQNGKGRKYFHHNSDFYIPKATLKDSGSYFCRGLVGSKN<br>*****.*****:*****.****  |
| CD16b-NA2  | VSSETVNIITITQGLAVSTISSFSPPGYQVSFCLVMVLLFAVDTGLYFSVKTNI-----                             |
| CD16b-NA1  | VSSETVNIITITQGLAVSTISSFSPPGYQVSFCLVMVLLFAVDTGLYFSVKTNI-----                             |
| CD16a-V158 | VSSETVNIITITQGLAVSTISSFFPPGYQVSFCLVMVLLFAVDTGLYFSVKTNIRSSTRDW                           |
| CD16a-F158 | VSSETVNIITITQGLAVSTISSFFPPGYQVSFCLVMVLLFAVDTGLYFSVKTNIRSSTRDW<br>*****                  |
| CD16b-NA2  | -----                                                                                   |
| CD16b-NA1  | -----                                                                                   |
| CD16a-V158 | KDHKFKWRKDPQDK                                                                          |
| CD16a-F158 | KDHKFKWRKDPQDK                                                                          |

**Figure S1.** The two predominant CD16b alleles (NA2 and NA1) differ at four residues (S/R18, S/N47, N/D64 and I/V88) resulting in four potential N-glycans on NA1 and six for NA2. The text is labeled as follows: *red* type denotes the N-terminal signal peptide; *yellow* type indicates cysteine residues that form disulfides; *green* asparagines (N) indicate a potential N-linked glycosylation site; “\*” indicates sequence conservation, “.” indicates a difference in one or more sequences; *orange* indicates C-terminal peptide cleaved for a glycosyl-phosphatidyl inositol (GPI) anchor in the mature CD16b protein.

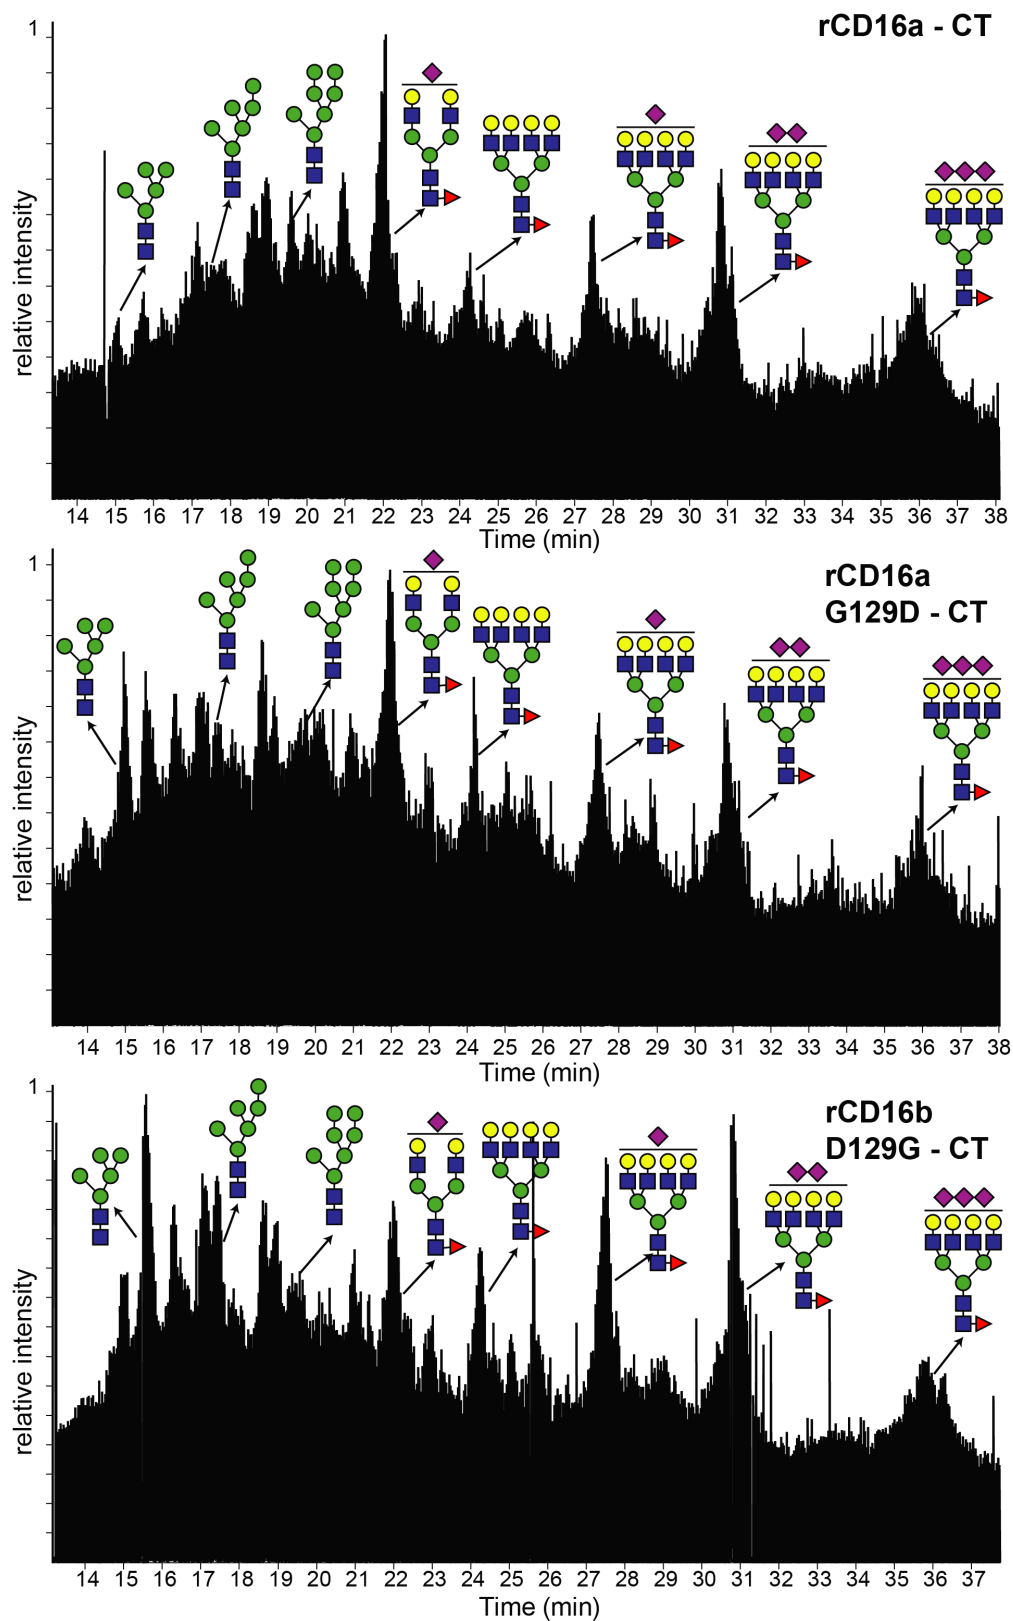

**Figure S2.** Total ion current of procainamide-derivatized CD16 N-glycans expressed using HEK293F cells and analyzed by HILIC-MS.

| rCD16b:IgG1-Fc complex (reported here, pdb 6eaq) |                                                                                 | rCD16a:IgG1-Fc complex (pdb 5vu0) |                                                                                 |
|--------------------------------------------------|---------------------------------------------------------------------------------|-----------------------------------|---------------------------------------------------------------------------------|
| <b>rCD16b</b>                                    | <b><u>IgG1-Fc-Chain B</u></b>                                                   | <b>rCD16a</b>                     | <b><u>IgG1-Fc-Chain B</u></b>                                                   |
| GLU 21                                           | PRO 329                                                                         | GLU 21                            | PRO 329                                                                         |
| ILE 88                                           | ALA 330                                                                         | ILE 88                            | <b>PRO 329</b> , ALA 330                                                        |
| GLY 89                                           | PRO 329                                                                         | GLY 89                            | PRO 329                                                                         |
| TRP 90                                           | LEU 235, GLY 236, <b>GLY 237</b> ,<br><b>PRO 238</b> ,                          | TRP 90                            | LEU 235, GLY 236, ALA 327, LEU 328,<br><br>PRO 329                              |
|                                                  | ALA 327, LEU 328, PRO 329                                                       |                                   |                                                                                 |
| TRP 113                                          | ALA 327, LEU 328, PRO 329                                                       | TRP 113                           | <b>LYS 326</b> , ALA 327, LEU 328, PRO 329                                      |
| THR 116                                          | LEU 235                                                                         | THR 116                           | LEU 235                                                                         |
| ALA 117                                          | LEU 235                                                                         | ALA 117                           | LEU 235                                                                         |
| VAL 158                                          | LEU 235, GLY 236                                                                | VAL 158                           | LEU 235, GLY 236                                                                |
| GLY 159                                          | LEU 235, <b>GLY 237</b>                                                         | GLY 159                           | LEU 235                                                                         |
| LYS 161                                          | <u>GLY 236</u> , GLY 237, <u>PRO 238</u> ,<br>SER 239                           | LYS 161                           | <u>GLY 236</u> , GLY 237, <u>PRO 238</u> ,<br>SER 239, <b>LEU 328</b>           |
|                                                  |                                                                                 |                                   |                                                                                 |
|                                                  | <b><u>IgG1-Fc-Chain A</u></b>                                                   |                                   | <b><u>IgG1-Fc-Chain A</u></b>                                                   |
| HIS 119                                          | LEU 235, GLY 236                                                                | HIS 119                           | LEU 235, GLY 236                                                                |
| LYS 120                                          | GLY 236, <u>GLY 237</u> , PRO 238,<br><u>SER 239</u> ,<br><b><u>ASP 265</u></b> | LYS 120                           | GLY 236, <u>GLY 237</u> , PRO 238,<br><u>SER 239</u> ,<br><b><u>ASP 265</u></b> |
| THR 122                                          | (1)GlcNAc, ASN 297                                                              | THR 122                           | (1)GlcNAc, ASN 297                                                              |
| GLY 127                                          | TYR 296                                                                         | <b>ASN 126</b>                    | <b>TYR 296</b>                                                                  |
| LYS 128                                          | <b>TYR 296</b> , <b>ASN 297</b> , <b>SER 298</b>                                | GLY 127                           | TYR 296                                                                         |
| ASP 129                                          | <b>GlcNAc1</b> , ASN 297, SER 298                                               | LYS 128                           | TYR 296                                                                         |
| ARG 130                                          | SER 298                                                                         | GLY 129                           | <b>TYR 296</b> , ASN 297, SER 298                                               |
| LYS 131                                          | HIS 268, <b>Glu 269</b> , <b>SER 298</b>                                        | ARG 130                           | SER 298                                                                         |
| TYR 132                                          | (1)GlcNAc , GLY 237, <u>ASP 265</u> ,<br>SER 267, SER298,                       | LYS 131                           | HIS 268, <b>GLU 269</b>                                                         |
|                                                  |                                                                                 | TYR 132                           | (1)GlcNAc , GLY 237, <u>ASP 265</u> ,<br>SER 267,<br><b>ASN 297</b> , SER 298   |
| PHE 133                                          | GLU 269                                                                         | PHE 133                           | GLU 269                                                                         |
| HIS 134                                          | GLY 236, GLY 237, PRO 238, ASP 265,<br><br>SER 267, ALA 327                     | HIS 134                           | GLY 236, GLY 237, PRO 238,<br>ASP 265,<br><b>VAL 266</b> , SER 267, ALA 327     |
|                                                  |                                                                                 |                                   |                                                                                 |
| HIS 135                                          | LEU 235, GLY 236, <b>GLY 237</b>                                                | HIS 135                           | LEU 235, GLY 236                                                                |
|                                                  |                                                                                 | <b>ARG 155</b>                    | (1)GlcNAc , ASN 297                                                             |
|                                                  |                                                                                 | <b>GLY 159</b>                    | <b>LEU 235</b>                                                                  |

**Figure S3.** A catalog of residues found at the CD16 – IgG1 Fc interface. All residue contacts are < 5 Å and were identified using the PDBe Pisa online utility tool (49). Residues that form hydrogen bonds are *underlined*. Residues that form ionic interactions are *underlined* and *bold*. Red type denotes a differences between CD16a and CD16b.
